# Supplementary material for: The Ottawa Statement on the Ethical Design and Conduct of Cluster Randomized Trials
Source: PubMed Central journal article supplement (PMC3502500; doi:10.1371/journal.pmed.1001346), 2012-11-20
Supplement: pmed.1001346.s002.pdf [file pmed.1001346.s002.pdf]

## **S2: Members of the Ottawa Ethics of Cluster Randomized Trials Consensus Group**

### Expert Panel

**Fernando Althabe** MD, MSc

*Trialist*

Director, Department of Mother and Child Health Research, Institute for Clinical Effectiveness and Health Policy; Professor of Public Health, School of Public Health, University of Buenos Aires Medical School, Buenos Aires, Argentina

**Allan Donner** PhD, FRSC

*Biostatistician, Research Team*

Professor of Epidemiology and Biostatistics, Western University, London, Ontario, Canada

**Geneviève Dubois-Flynn** PhD

*Research Funder*

Manager and Senior Advisor of the Canadian Institutes for Health Research Ethics Office, Ottawa, Canada

**Martin P. Eccles** MD, FMedSci, FRCP, FRCGP, FFPHM

*Trialist, Journal Editor, Research Team, Writing Group, Panel Chair*

Professor of Primary Care Research and of Clinical Effectiveness, Newcastle University, Newcastle upon Tyne, UK

**Sarah Edwards** PhD

*Bioethicist*

Senior Lecturer in Research Ethics and Governance; Centre for Philosophy, Justice and Health, University College London, UK

**Diana Elbourne** PhD

*Trialist*

Professor of Healthcare Evaluation, London School of Hygiene and Tropical Medicine, London, UK

**Sandra Eldridge** PhD

*Biostatistician, Trialist*

Professor of Biostatistics, Barts and The London School of Medicine and Dentistry, Queen Mary University of London, London, UK

**David Forster** JD, MA, CIP

*Research Ethics Perspective*

Chief Compliance Officer, Office of Compliance, Western IRB, Olympia, Washington, USA

**Jeremy M. Grimshaw** MBChB, PhD, FRCGP

*Trialist, Journal Editor, Co-principal Investigator, Writing Group*  
Senior Scientist, Ottawa Hospital Research Institute; Professor of Medicine, University of  
Ottawa, Ottawa, Ontario, Canada

**Melody Lin PhD**

*Regulator*

Deputy Director, Office for Human Research Protections and Director, International Activities,  
Office for Human Research Protections, Department of Health & Human Services, Rockville,  
Maryland, USA

**Elizabeth Loder MD, MPH**

*Journal Editor*

Clinical Epidemiology Editor, BMJ and Associate Professor of Neurology, Harvard Medical  
School, Boston, Massachusetts, USA

**Eileen S. Naughton JD**

*Policy Maker*

Rhode Island Representative, National Institutes of Health Council of Public Representatives,  
Providence, Rhode Island, USA

**Rex J. Polson LL.M., MD, FRCP**

*Research Ethics Chair*

Chair of West Midlands – Solihull Research Ethics Committee, and Consultant Physician,  
Solihull Hospital, Heart of England NHS Foundation Trust, UK

**Raphael Saginur MD**

*Research Ethics Chair, Research Team*

Chair, Ottawa Hospital Research Ethics Board; Chief of Infectious Diseases, Ottawa

**Abha Saxena MD**

*Scientist*

Executive Secretary, Research Ethics Review Committee, World Health Organization, Geneva,  
Switzerland

**Julie Spence MD**

*Research Ethics Chair*

Past Chair, Research Ethics Board, Department of Emergency Medicine, St. Michael's Hospital,  
Assistant Professor, University of Toronto, Toronto, Ontario, Canada

**Charles Weijer MD, PhD**

*Ethicist, Co-principal Investigator, Writing Group*

Professor, Rotman Institute of Philosophy, Western University, London, Ontario, Canada

**Gerald White BComm**

*Policy Perspective*

Former Assistant Deputy Minister of Health in Newfoundland and Labrador, Member of Health Council of Canada, Canada

**Merrick Zwarenstein MD, PhD**

*Trialist, Research Team*

Senior Scientist, Institute for Clinical Evaluative Studies, Toronto, Ontario, Canada

### Expert Discussants

**Catarina Kiefe PhD, MD**

*Trialist, Journal Editor*

Professor and Chair, Dept of Quantitative Health Sciences, University of Massachusetts Medical School, Worcester, Massachusetts USA

**Jonathan Kimmelman PhD**

*Ethicist*

Associate Professor, Biomedical Ethics Unit, McGill University, Montreal, Quebec, Canada

**Kathleen Lohr MA, MPhil, PhD**

*Distinguished Fellow (Health Services Research)*

RTI International, Research Triangle Park, North Carolina, USA

### Research Team (not on the Expert Panel)

**Ariella Binik PhD (c)**

*Research Team*

Rotman Institute of Philosophy, Western University, London, Ontario, Canada

**Judith Belle Brown MSW, PhD**

*Research Team*

Professor, Department of Family Medicine, Western University, London, Ontario, Canada

**Robert Boruch PhD**

*Research Team*

Professor of Education and Statistics, Co-Director, Center for Research and Evaluation in Social Policy, University of Pennsylvania, Philadelphia, Pennsylvania, USA

**Jamie C. Brehaut PhD**

*Research Team, Writing Group*

Scientist, Ottawa Hospital Research Institute; Associate Professor, University of Ottawa, Ottawa, Ontario, Canada

**Shazia Chaudhry** MSc

*Research Team*

PhD candidate, Department of Epidemiology and Community Medicine, University of Ottawa, Ottawa, Canada

**Antonio Gallo** BSc

*Research Team*

Rotman Institute of Philosophy and Schulich School of Medicine and Dentistry, Western University, London, Ontario, Canada

**Andrew McRae** MD, PhD, FRCPC

*Research Team, Writing Group*

Research Director, Division of Emergency Medicine, University of Calgary, Calgary, Alberta, Canada

**Monica Taljaard** PhD

*Biostatistician, Co-principal Investigator, Writing Group*

Scientist, Ottawa Hospital Research Institute, Ottawa, Ontario, Canada

**Angela White** PhD

*Research Team, Writing Group*

Rotman Institute of Philosophy Postdoctoral Fellow in Bioethics, Western University, London, Ontario, Canada
